# Supplementary material for: Ataxin-2 is essential for cytoskeletal dynamics and neurodevelopment in Drosophila
Source: PubMed Central journal article supplement — iScience. 2021 Dec 3;25(1):103536. doi: 10.1016/j.isci.2021.103536 (PMC8689088; doi:10.1016/j.isci.2021.103536), 2021-12-03
Supplement: mmc1.pdf [file mmc1.pdf]

iScience, Volume 25

**Supplemental information**

**Ataxin-2 is essential for cytoskeletal dynamics  
and neurodevelopment in *Drosophila***

**Urko del Castillo, Rosalind Norkett, Wen Lu, Anna Serpinskaya, and Vladimir I. Gelfand**

Supplementary Items

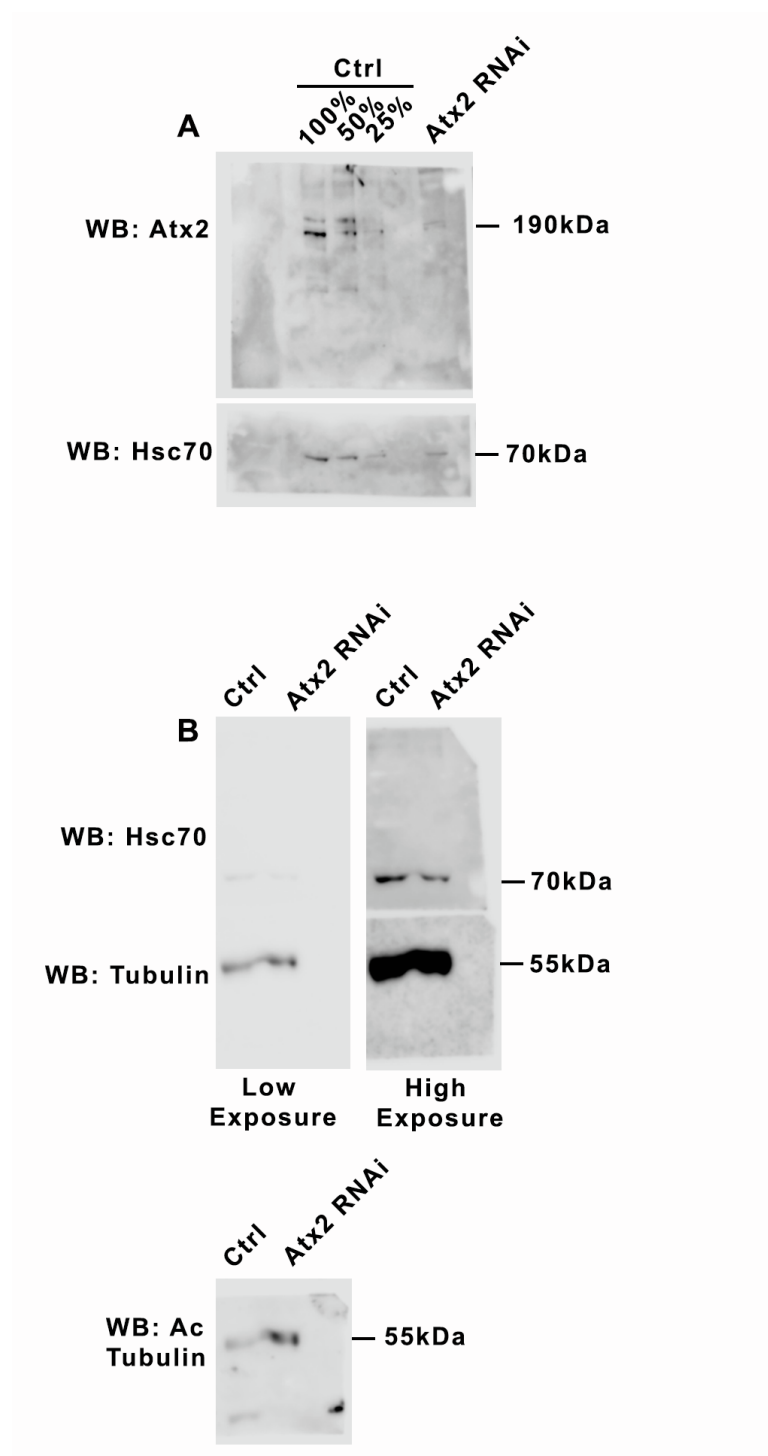

**Figure S1. Ataxin-2 depletion in brains by western blot.** Related to Figure 1E. **A)** Western blot demonstrating knockdown of Atx2 by *elav>Atx2* shRNA #44012. **B)** Complete western blot membranes showing Acetylated tubulin, total tubulin and Hsc70 (loading control) levels.

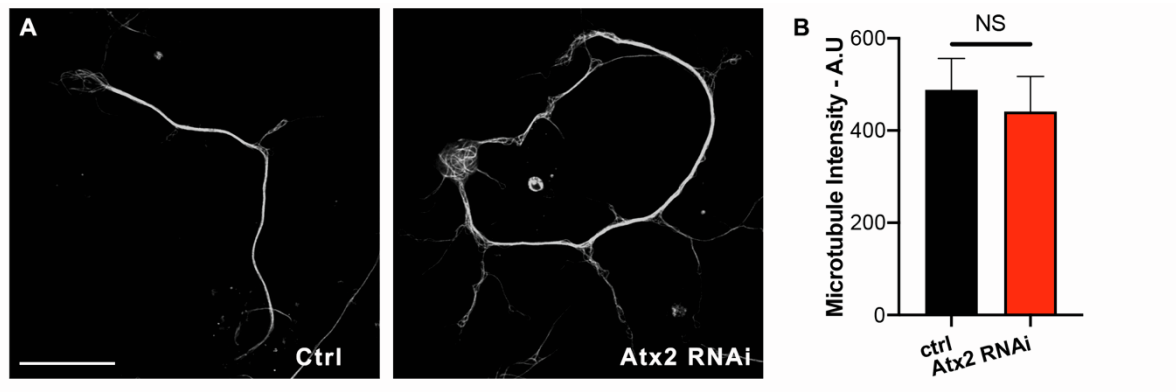

**Figure S2. Microtubule content is equal in control vs Atx2 RNAi neurons in culture.** Related to Figure 1N. **A)** Example images showing tubulin staining in extracted neurons. Scale bar, 20 $\mu$ m. **B)** Quantification of tubulin signal intensity (Control =  $488.4 \pm 67.7$ , n = 8 cells, Atx2 RNAi =  $441.2 \pm 76.1$ , n = 6 cells, NS p = 0.85).

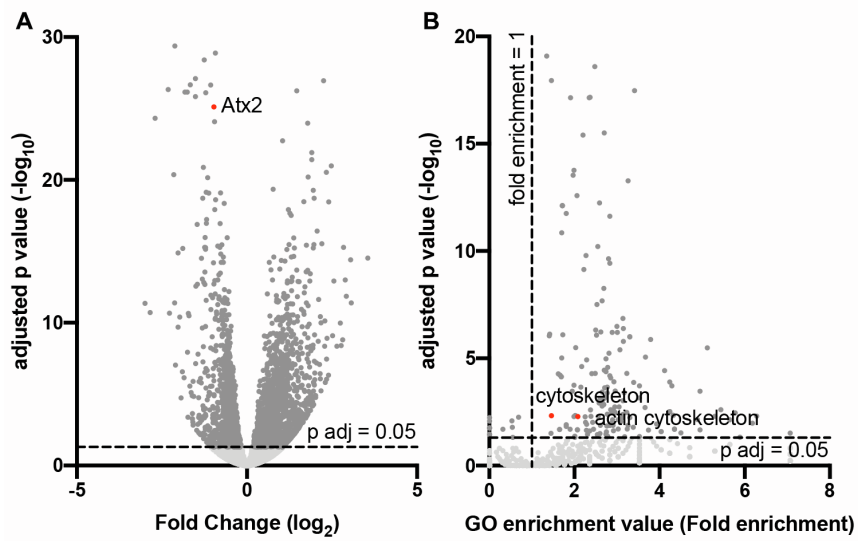

**Figure S3. RNAseq analysis in control vs. *elav>Atx2RNAi* larvae brains shows differential expression of multiple cytoskeletal proteins.** Related to Figure 3. **A)** Volcano plot showing magnitude of change vs statistical significance of all differentially expressed genes in control vs *Atx2* knockdown brains. **B)** Representation of Gene Ontology analysis cellular component of significantly differentially expressed genes. Fold enrichment compared to reference transcriptome.

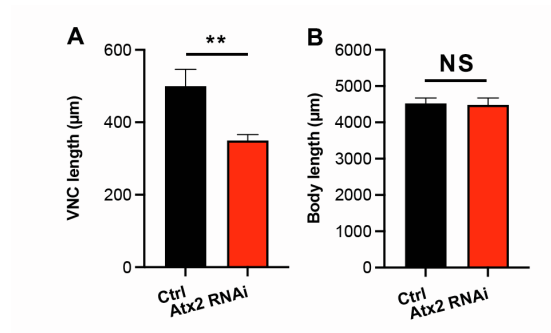

**Figure S4. Neuron specific Atx2 depletion decreases VNC length without affecting body length.** Related to Figure 4A-C. **A)** Length of VNC of Control and Atx2 RNAi animals (Control =  $500\mu\text{m} \pm 46.7$ , Atx2 RNAi =  $350\mu\text{m} \pm 16.5$ ,  $n = 8$  Control and 10 Atx2 RNAi animals,  $p = 0.0035$ ). **B)** Length of body of Control and Atx2 RNAi animals (Control =  $4523\mu\text{m} \pm 152$ , Atx2 RNAi =  $4480\mu\text{m} \pm 180$ ,  $n = 8$  Control and 10 Atx2 RNAi animals, NS = not significant).

**Table S1. Cytoskeletal genes differentially expressed in *elav>Atx2* RNAi brains.** Related to Figure 1 and 2.

| Protein Class (GO term)                                          | Gene        | Log <sub>2</sub> FC | FDR adj pvalue |
|------------------------------------------------------------------|-------------|---------------------|----------------|
| microtubule binding motor protein(PC00156)                       | Klc         | -0.2762914          | 0.0023462      |
|                                                                  | Kap3        | -0.288398           | 0.02448984     |
|                                                                  | Kif3C       | 1.14466294          | 9.05E-05       |
|                                                                  | Dhc64C      | -0.3329616          | 0.04060265     |
|                                                                  | Klp3A       | -0.3331195          | 0.01395657     |
|                                                                  | Khc         | -0.2767442          | 0.00498595     |
| microtubule or microtubule-binding cytoskeletal protein(PC00157) | CG9313      | 0.84112939          | 0.03499158     |
| non-motor microtubule binding protein(PC00166)                   | Kat60       | -0.3337638          | 0.00808252     |
| tubulin(PC00228)                                                 | betaTub56D  | -0.2925545          | 0.03785787     |
|                                                                  | alphaTub84B | -0.3704931          | 0.0050767      |
| actin binding motor protein(PC00040)                             | Myo31DF     | 0.32221979          | 0.0001427      |
|                                                                  | up          | 1.16374185          | 0.02387464     |
| actin and actin related protein(PC00039)                         | Arp2        | -0.2474226          | 0.0427629      |
| actin or actin-binding cytoskeletal protein(PC00041)             | Zasp52      | 0.39860413          | 0.03571863     |
|                                                                  | Arpc1       | 0.27096692          | 0.04813796     |
| non-motor actin binding protein(PC00165)                         | Abp1        | -0.2401069          | 0.04263514     |
|                                                                  | scra        | -0.2459263          | 0.04411634     |
|                                                                  | flr         | -0.3226018          | 0.0096699      |
|                                                                  | Fim         | -0.5251629          | 0.00108723     |
|                                                                  | pod1        | -0.9831411          | 6.31E-15       |
|                                                                  | hts         | -0.4116757          | 0.00020457     |
|                                                                  | cpa         | -0.355635           | 0.0011015      |
|                                                                  | tsr         | -0.3179894          | 0.04207127     |
|                                                                  | SCAR        | -0.3788852          | 0.00018631     |
|                                                                  | Chd64       | 0.88079224          | 3.38E-09       |
|                                                                  | alpha-Cat   | -0.3769759          | 0.01529481     |
|                                                                  | sn          | -0.974603           | 1.16E-06       |
|                                                                  | Gel         | 0.96060323          | 7.11E-07       |

|                                                |          |            |            |
|------------------------------------------------|----------|------------|------------|
| cytoskeletal protein(PC00085)                  | Septin 1 | -0.3453684 | 0.03787749 |
|                                                | pnut     | -0.3280229 | 0.00016569 |
|                                                | Septin 2 | -0.434462  | 7.82E-05   |
| intermediate filament binding protein(PC00130) | p120ctn  | -0.4699921 | 0.00556039 |
|                                                | shot     | 0.34320575 | 0.03550769 |
